# Supplementary material for: OTP970 Is Required for RNA Editing of Chloroplast ndhB Transcripts in Arabidopsis thaliana
Source: MDPI journal article supplement (doi:10.3390/genes13010139), 2022-01-14
Supplement: s1 [file s1]

## Supplementary data

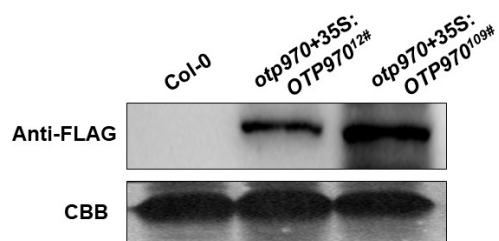

**Figure S1.** Western blot analysis of *otp970* complemented 35:OTP970/*otp970* plants.

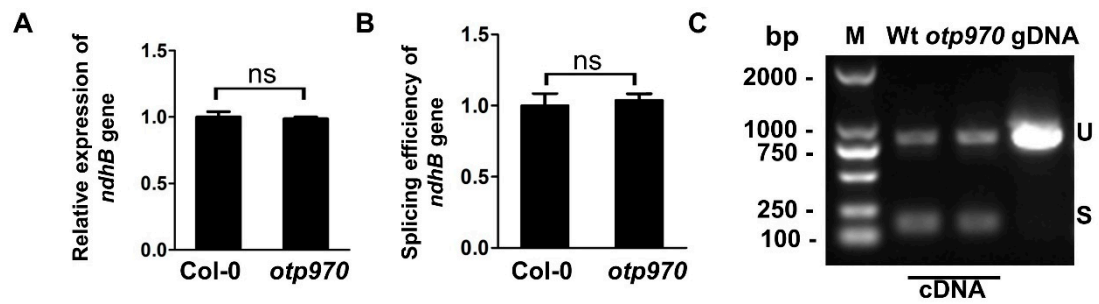

**Figure S2.** Transcript profiles of genes with the editing defects in *otp970*. (A) RT-qPCR-based analysis of *ndhB* expression. (B) RT-qPCR-based analysis of splicing efficiency of *ndhB* in wild-type and *otp970* plant. (C) RT-PCR analysis of the *ndhB* transcripts from wild-type (Col-0), *otp970* plant. Molecular weight markers (M) are shown on the left; the product amplified from total DNA (gDNA) is shown in the right side. S, Spliced; U, unspliced. Significant differences were identified using the Student's *t*-test, ns indicated no significant differences.

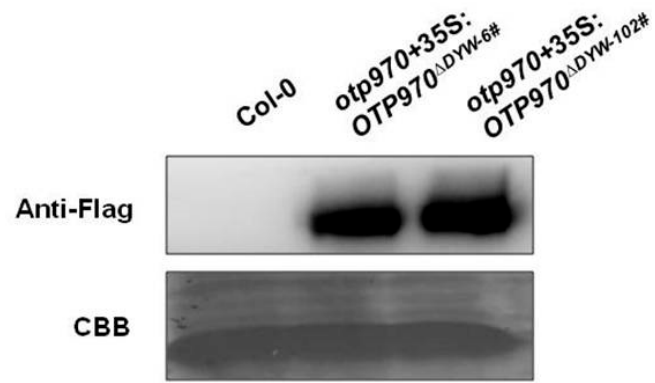

**Figure S3.** Western blot analysis of the OTP970 lacking the DYW motif (OTP970<sup>ΔDYW</sup>). OTP970<sup>ΔDYW</sup> protein was fused with flag and then transformed in *otp970*. Anti-Flag antibody was used to detection the wild-type (Col-0) and two transgenic plants. CBB, Coomassie brilliant blue.

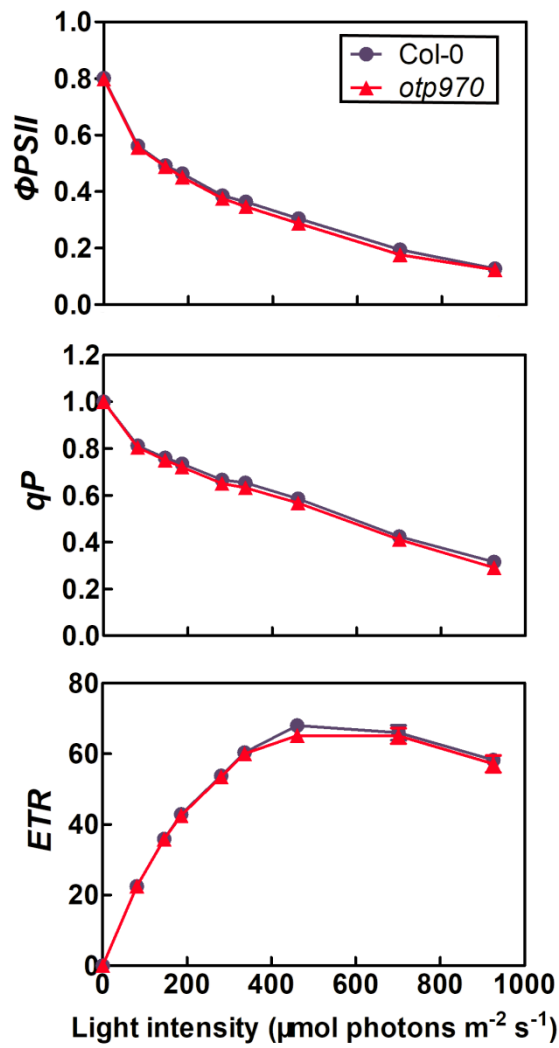

**Figure S4.** In vivo analysis of electron transport activity in wild-type and *otp970* Arabidopsis mutant plants. Light-response curves of PSII quantum yield ( $\Phi_{\text{PSII}}$ ), photochemical quenching ( $qP$ ), and electron transport rate ( $ETR$ ) from 4-week-old Col-0 and *otp970* plants. Chl fluorescence measurements were performed at the following light intensities: 0, 81, 145, 186, 281, 335, 461, 701 and 926  $\mu\text{mol photons m}^{-2} \text{ s}^{-1}$ . Data for wild-type and *otp970* plants are presented as the mean  $\pm$  SE of triplicates.

**Table S1. List of primers used in this study**

| Primer                       | Sequence                                          |
|------------------------------|---------------------------------------------------|
| Mutants Identification       |                                                   |
| SALK_150217-F                | 5'- TGGTTTTGTATGGAATCCAGC-3'                      |
| SALK_150217-R                | 5'- AACATTGATGTTTGTCTCGCC-3'                      |
| Real Time-PCR                |                                                   |
| OTP970-F                     | 5'- AAGTTGCTGCTAAGTTATTCTG-3'                     |
| OTP970-R                     | 5'-CACTTAGATCATGTTGTACTGACA-3'                    |
| ndhB-F                       | 5'- TCATCAATGGACTCCTGACG -3'                      |
| ndhB-R                       | 5'- CCAGAAGAAGATGCCATTCA -3'                      |
| ndhB introns-F               | 5'- AGTCTCATGCACGGTTTTGA -3'                      |
| ndhB introns-R               | 5'- CCAGAAGAAGATGCCATTCA -3'                      |
| ACTIN 2-F                    | 5'-GGTAACATTGTGCTCAGTGGTG-3'                      |
| ACTIN 2-R                    | 5'-CTCGGCCTTGGAGATCCACATC-3'                      |
| GFP Assay                    |                                                   |
| OTP970-100AA-F               | 5'-CCTGGCGCGCCACTAGTGGATCCATGGCTTCTGTTTTGCTTCC-3' |
| OTP970-100AA-R               | 5'-GAGCGGTACCCTCGAGGTCGACAATGTCTTTTCTCTTCCCA-3'   |
| RIP Assay                    |                                                   |
| ndhB-149-F                   | 5'-CTTCTGATGATCGATTCAACC-3'                       |
| ndhB-149-R                   | 5'-TCAATGTACTCTACGGATAGAGG-3'                     |
| psbF-77-F                    | 5'-GGACCTATCCAATTTTACAGTGC-3'                     |
| psbF-77-R                    | 5'-GTTGGATGAACTGCATTGCT-3'                        |
| Complementation Assay        |                                                   |
| OTP970cDNA-F                 | 5'-CACGGGGGACTAAGCTTATGGCTTCTGTTTTGCTTCC-3'       |
| OTP970cDNA-R                 | 5'-CCTTGTAATCACTAGTCCAGTAATCTCCACAAGAAC-3'        |
| OTP970 <sup>DYW</sup> cDNA-F | 5'- CACGGGGGACTAAGCTTATGGCTTCTGTTTTGCTTCC-3'      |
| OTP970 <sup>DYW</sup> cDNA-R | 5'-CCTTGTAATCACTAGTCTTTCGTAAACTCATCTCGT-3'        |
| RT-PCR Assay                 |                                                   |

---

|           |                              |
|-----------|------------------------------|
| OTP970-F  | 5'- TGTCTGATGTTGGGATCGG -3'  |
| OTP970-R  | 5'- CATGTGTATCACCTCTGCTG-3'  |
| ndhB-F    | 5'- TCATCAATGGACTCCTGACG -3' |
| ndhB-R    | 5'- CCAGAAGAAGATGCCATTCA -3' |
| ACTIN 2-F | 5'- CTCTTCCTCATGCCATCCTC-3'  |
| ACTIN 2-R | 5'-GCTCATACGGTCAGCGATAC-3'   |

---
